# Supplementary material
Source: PubMed Central journal article supplement (PMC4306698)
Supplement: supp_P055459_Supplemental_Figure_1.pdf [file supp_P055459_Supplemental_Figure_1.pdf]

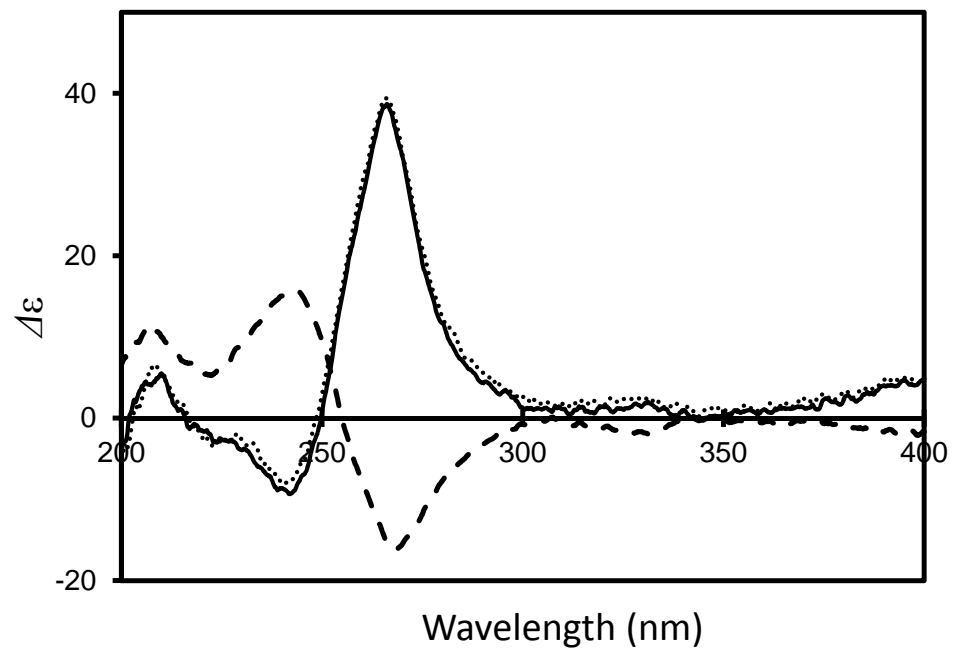

**Supplemental Figure 1.** CD spectra of 3'-hydroxyl-ε,ε-carotene-3-one isomers in ethanol. Peak A1, dashed line; Peak A2, solid line; (6'R,3R,6R)-3'-hydroxyl-ε,ε-carotene-3-one prepared from lactucaxanthin, dotted line.
