# Supplementary material
Source: PubMed Central journal article supplement (PMC4306698)
Supplement: supp_P055459_Supplemental_Figure_2.pdf [file supp_P055459_Supplemental_Figure_2.pdf]

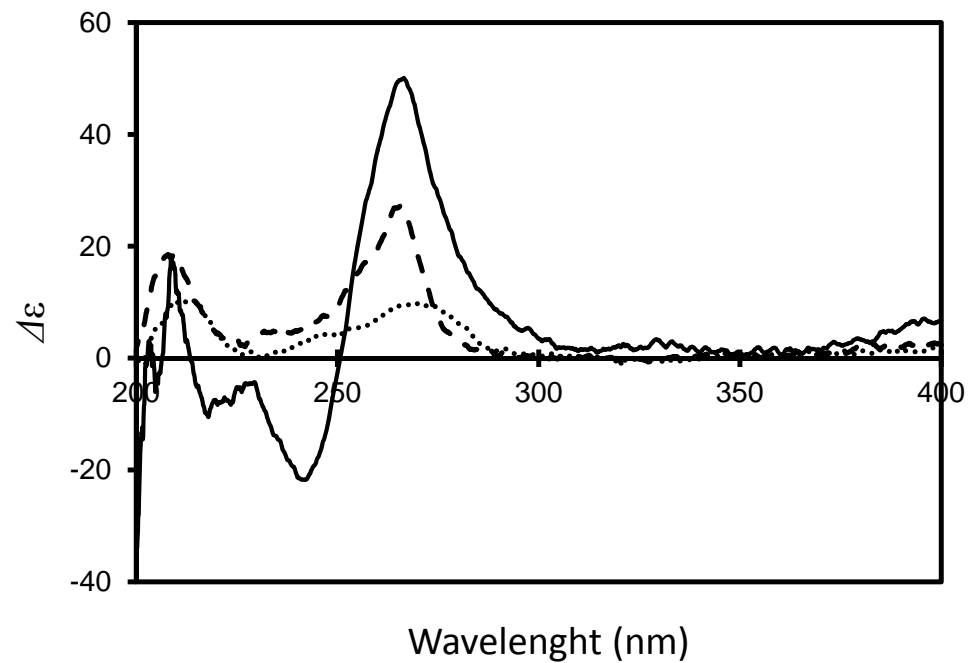

**Supplemental Figure 2.** CD spectra of (*6'R,6R*)- $\epsilon,\epsilon$ -carotene-3,3'-dione prepared from lactucaxanthin (solid line), lactucaxanthin (dashed line), and 3'-hydroxyl- $\beta,\epsilon$ -carotene-3-one isolated from the reaction mixture of lutein with liver postmitochondrial fraction (dotted line), in ethanol.
