# Supplementary material
Source: PubMed Central journal article supplement (PMC4306698)
Supplement: supp_P055459_Supplemental_Figure_3.pdf [file supp_P055459_Supplemental_Figure_3.pdf]

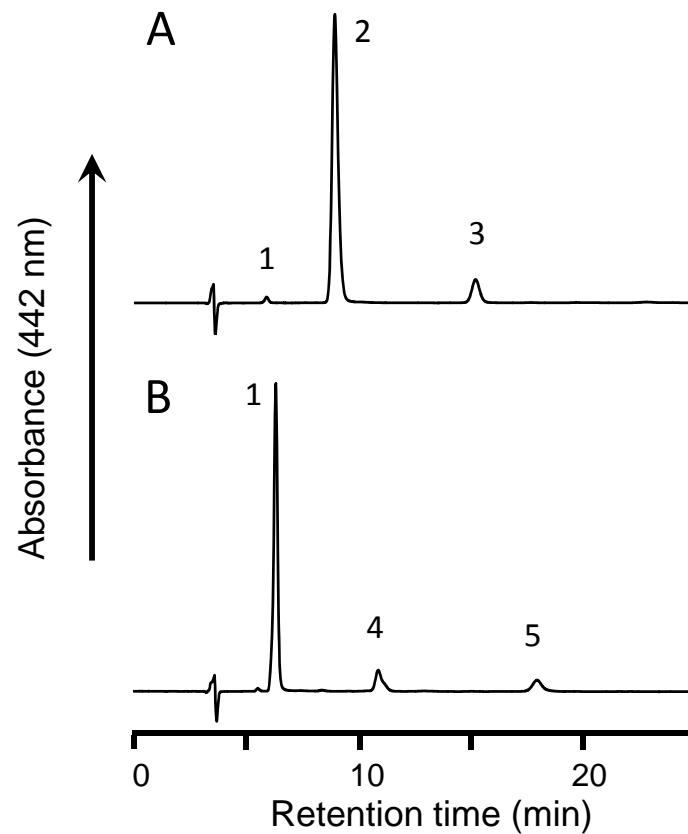

**Supplemental Figure 3.** Normal-phase HPLC profiles of extracts from incubation mixtures of lutein (A) and zeaxanthin (B) with liver postmitochondrial fraction after a prolonged incubation. 1,  $\epsilon,\epsilon$ -carotene-3,3'-dione; 2, 3'-hydroxyl- $\epsilon,\epsilon$ -carotene-3-one; 3, lutein; 4, 3-hydroxyl- $\beta,\epsilon$ -carotene-3'-one; 5, zeaxanthin.
