# Supplementary material
Source: PubMed Central journal article supplement (PMC4306698)
Supplement: supp_P055459_Supplemental_Figure_4.pdf [file supp_P055459_Supplemental_Figure_4.pdf]

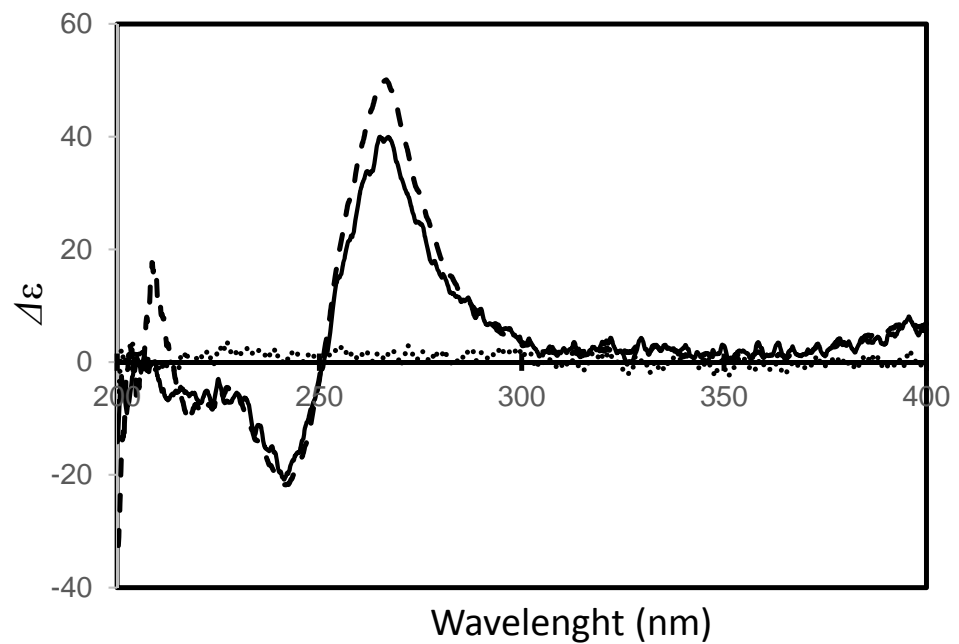

**Supplemental Figure 4.** CD spectra of  $\epsilon,\epsilon$ -carotene-3,3'-dione isomers in ethanol. Peak E1, dotted line; Peak E2, solid;  $(6R,6'R)$ - $\epsilon,\epsilon$ -carotene-3,3'-dione prepared from lactucaxanthin, dashed line.
