# Supplementary material
Source: PubMed Central journal article supplement (PMC4306698)
Supplement: supp_P055459_Supplemental_Figure_5.pdf [file supp_P055459_Supplemental_Figure_5.pdf]

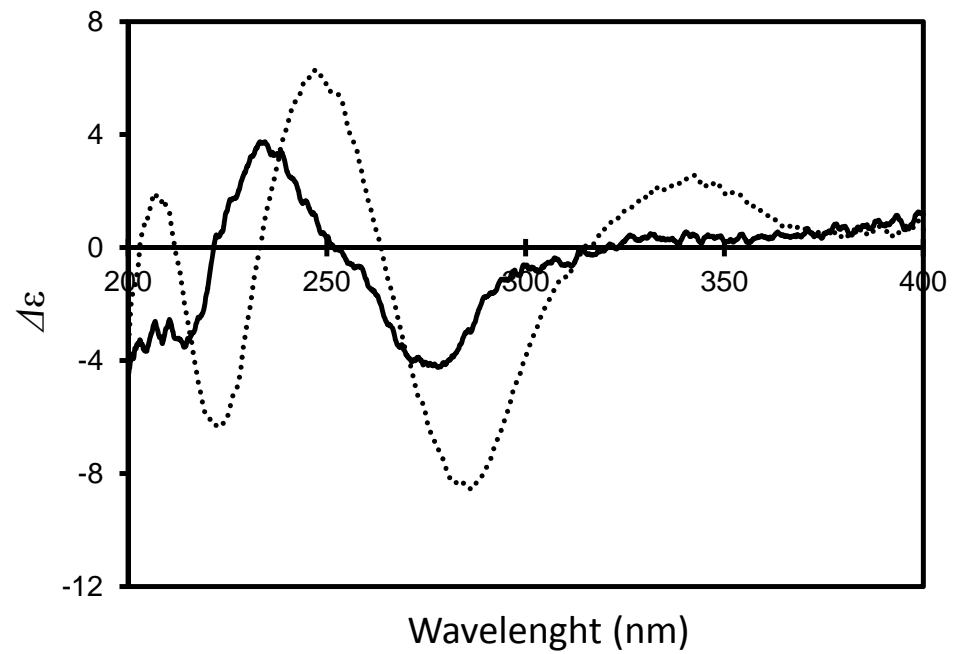

**Supplemental Figure 5.** CD spectra of  $\beta$ -cryptoxanthin (dotted line) and 3-hydroxyl- $\beta,\epsilon$ -carotene-3'-one isolated from the reaction mixture of zeaxanthin with liver postmitochondrial fraction (solid line), in ethanol.
