# Supplementary material
Source: PubMed Central journal article supplement (PMC4306698)
Supplement: supp_P055459_Supplemental_Table_1.pdf [file supp_P055459_Supplemental_Table_1.pdf]

Supplemental Table 1 <sup>1</sup>H and <sup>13</sup>C NMR data of oxidation products formed from xanthophylls

| no  | 3'-hydroxy- $\epsilon,\epsilon$ -caroten-3-one |                    |                          | 3'-hydroxy- $\beta,\epsilon$ -coroten-3-one |                    |                          |
|-----|------------------------------------------------|--------------------|--------------------------|---------------------------------------------|--------------------|--------------------------|
|     | $\delta^{13}\text{C}$                          | $\delta^1\text{H}$ | mult (J in Hz)           | $\delta^{13}\text{C}$                       | $\delta^1\text{H}$ | mult (J in Hz)           |
| 1   | 36.6                                           |                    |                          | 39.4                                        |                    |                          |
| 2   | 47.4                                           | 2.11<br>2.39       | d (17)<br>d (17)         | 54.7                                        | 2.43               | s                        |
| 3   | 199.7                                          |                    |                          | 210.5                                       |                    |                          |
| 4   | 125.5                                          | 5.92               | br. s                    | 46.2                                        | 2.91               | br. s                    |
| 5   | 162.7                                          |                    |                          | 125.4                                       |                    |                          |
| 6   | 56.3                                           | 2.61               | d (10)                   | 138.9                                       |                    |                          |
| 7   | 125.5                                          | 5.54               | dd (15, 9)               | 124.4                                       | 6.10               | d (16)                   |
| 8   | 138.4                                          | 6.24               | d (15)                   | 138.9                                       | 6.17               | d (16)                   |
| 9   | 134.4                                          |                    |                          | 135.2                                       |                    |                          |
| 10  | 132.0                                          | 6.17               | d (11)                   | 131.9                                       | 6.20               | d (11)                   |
| 11  | 124.4                                          | 6.60               | dd (16, 12)              | 124.7                                       | ~6.65              | overlapped               |
| 12  | 138.3                                          | 6.39               | d (15)                   | 138.0                                       | 6.39               | d (15)                   |
| 13  | 136.3                                          |                    |                          | 136.4                                       |                    |                          |
| 14  | 133.0                                          | 6.28               | d (11)                   | 132.9                                       | 6.28               | d (9)                    |
| 15  | 129.9                                          | ~6.65              | overlapped               | 129.9                                       | ~6.65              | overlapped               |
| 16  | 27.5/27.9                                      | 0.97/1.05          | s                        | 28.4                                        | 1.09               | s                        |
| 17  | 27.5/27.9                                      | 0.97/1.05          | s                        | 28.4                                        | 1.09               | s                        |
| 18  | 23.8                                           | 1.92               | s                        | 20.8                                        | 1.78               | s                        |
| 19  | 13.0                                           | 1.92               | s                        | 12.8                                        | 2.00               | s                        |
| 20  | 12.8                                           | 1.97               | s                        | 12.8                                        | 1.98               | s                        |
| 1'  | 34.0                                           |                    |                          | 34.0                                        |                    |                          |
| 2'  | 44.6                                           | 1.37<br>1.85       | dd (13, 7)<br>dd (13, 6) | 44.6                                        | 1.37<br>1.85       | dd (13, 7)<br>dd (13, 6) |
| 3'  | 65.9                                           | 4.26               | m                        | 65.9                                        | 4.26               | m                        |
| 4'  | 124.4                                          | 5.55               | br. s                    | 124.4                                       | 5.55               | br. s                    |
| 5'  | 138.0                                          |                    |                          | 138.0                                       |                    |                          |
| 6'  | 54.8                                           | 2.41               | d (11)                   | 54.8                                        | 2.41               | d (9)                    |
| 7'  | 128.8                                          | 5.43               | d (15, 10)               | 128.8                                       | 5.43               | d (16, 10)               |
| 8'  | 137.7                                          | 6.14               | d (15)                   | 137.6                                       | 6.15               | d (16)                   |
| 9'  | 135.2                                          |                    |                          | 135.2                                       |                    |                          |
| 10' | 130.7                                          | 6.15               | d (11)                   | 130.7                                       | 6.15               | d (12)                   |
| 11' | 124.9                                          | 6.62               | dd (15, 12)              | 124.8                                       | 6.62               | dd (15, 11)              |
| 12' | 137.5                                          | 6.37               | d (15)                   | 137.5                                       | 6.37               | d (15)                   |
| 13' | 136.6                                          |                    |                          | 136.6                                       |                    |                          |
| 14' | 132.5                                          | 6.26               | d (11)                   | 132.5                                       | 6.26               | d (10)                   |
| 15' | 130.3                                          | ~6.65              | overlapped               | 130.2                                       | ~6.65              | overlapped               |
| 16' | 24.1/29.5                                      | 0.85/1.00          | s                        | 24.1/29.5                                   | 0.85/1.00          | s                        |
| 17' | 24.1/29.5                                      | 0.85/1.00          | s                        | 24.1/29.5                                   | 0.85/1.00          | s                        |
| 18' | 22.9                                           | 1.63               | s                        | 22.9                                        | 1.63               | s                        |
| 19' | 13.1                                           | 1.92               | s                        | 13.1                                        | 1.92               | s                        |
| 20' | 12.8                                           | 1.97               | s                        | 12.8                                        | 1.97               | s                        |

Supplemental Table 1 continued

| no  | $\beta,\epsilon$ -caroten-3'-one |                    |                | $\beta,\beta$ -caroten-3-one |                    |                |
|-----|----------------------------------|--------------------|----------------|------------------------------|--------------------|----------------|
|     | $\delta^{13}\text{C}$            | $\delta^1\text{H}$ | mult (J in Hz) | $\delta^{13}\text{C}$        | $\delta^1\text{H}$ | mult (J in Hz) |
| 1   | 34.2                             |                    |                | 39.4                         |                    |                |
| 2   | 39.5                             | 1.47               | m              | 54.7                         | 2.43               | s              |
| 3   | 19.2                             | 1.61               | m              | 210.5                        |                    |                |
| 4   | 33.1                             | 2.02               | t (6)          | 46.2                         | 2.91               | br. s          |
| 5   | 129.5                            |                    |                | 125.4                        |                    |                |
| 6   | 137.8                            |                    |                | 138.9                        |                    |                |
| 7   | 126.7                            | 6.16               | d (16)         | 124.4                        | 6.10               | d (16)         |
| 8   | 137.7                            | 6.14               | d (16)         | 138.9                        | 5.17               | d (16)         |
| 9   | 136.2                            |                    |                | 135.1                        |                    |                |
| 10  | 130.8                            | 6.16               | d (12)         | 132.0                        | 6.20               | d (11)         |
| 11  | 125.2                            | ~6.65              | overlapped     | 124.6                        | ~6.65              | overlapped     |
| 12  | 137.1                            | 6.36               | d (15)         | 138.0                        | 6.40               | d (15)         |
| 13  | 136.8                            |                    |                | 136.3                        |                    |                |
| 14  | 132.3                            | 6.26               | d (10)         | 132.9                        | 6.28               | d (9)          |
| 15  | 130.4                            | ~6.65              | overlapped     | 129.8                        | ~6.65              | overlapped     |
| 16  | 28.9                             | 1.03               | s              | 28.4                         | 1.09               | s              |
| 17  | 28.9                             | 1.03               | s              | 28.4                         | 1.09               | s              |
| 18  | 21.8                             | 1.72               | s              | 20.8                         | 1.78               | s              |
| 19  | 12.9                             | 1.98               | s              | 12.8                         | 2.00               | s              |
| 20  | 12.8                             | 1.98               | s              | 12.8                         | 1.98               | s              |
| 1'  | 36.6                             |                    |                | 34.2                         |                    |                |
| 2'  | 47.4                             | 2.11               | d (17)         | 39.5                         | 1.47               | m              |
|     |                                  | 2.39               | d (17)         |                              |                    |                |
| 3'  | 199.6                            |                    |                | 19.2                         | 1.61               | m              |
| 4'  | 125.5                            | 5.91               | br. s          | 33.1                         | 2.02               | t (6)          |
| 5'  | 162.7                            |                    |                | 129.5                        |                    |                |
| 6'  | 56.3                             | 2.61               | d (9)          | 137.8                        |                    |                |
| 7'  | 125.4                            | 5.53               | dd (15, 9)     | 126.7                        | 6.18               | br.d (16)      |
| 8'  | 138.4                            | 6.24               | d (15)         | 137.7                        | 6.14               | d (16)         |
| 9'  | 134.4                            |                    |                | 136.2                        |                    |                |
| 10' | 132.1                            | 6.18               | br.d (11)      | 130.8                        | 6.16               | br.d (12)      |
| 11' | 124.3                            | 6.59               | dd(15, 11)     | 125.1                        | ~6.65              | overlapped     |
| 12' | 138.3                            | 6.39               | d (15)         | 137.1                        | 6.37               | d (15)         |
| 13' | 136.1                            |                    |                | 136.7                        |                    |                |
| 14' | 133.1                            | 6.28               | d (10)         | 132.3                        | 6.26               | d (9)          |
| 15' | 129.7                            | ~6.65              | overlapped     | 130.3                        | ~6.65              | overlapped     |
| 16' | 27.5/27.9                        | 0.97/1.05          | s              | 28.9                         | 1.03               | s              |
| 17' | 27.5/27.9                        | 0.97/1.05          | s              | 28.9                         | 1.03               | s              |
| 18' | 23.8                             | 1.92               | s              | 21.8                         | 1.72               | s              |
| 19' | 13.1                             | 1.92               | s              | 12.8                         | 1.98               | s              |
| 20' | 12.8                             | 1.97               | s              | 12.9                         | 1.98               | s              |

Supplemental Table 1 continued

| 3-hydroxy- $\beta,\epsilon$ -caroten-3'-one |                       |                    |                | $\epsilon,\epsilon$ -carotene-3,3'-dione |                       |                    |                |
|---------------------------------------------|-----------------------|--------------------|----------------|------------------------------------------|-----------------------|--------------------|----------------|
| no                                          | $\delta^{13}\text{C}$ | $\delta^1\text{H}$ | mult (J in Hz) | no                                       | $\delta^{13}\text{C}$ | $\delta^1\text{H}$ | mult (J in Hz) |
| 1                                           | 37.1                  |                    |                | 1, 1'                                    | 36.6                  |                    |                |
| 2                                           | 48.2                  | 1.48               | dd (12, 12)    | 2, 2'                                    | 47.4                  | 2.11               | d (17)         |
|                                             |                       | 1.78               | m              |                                          |                       | 2.39               | d (17)         |
| 3                                           | 65.0                  | 4.01               | br. s          | 3, 3'                                    | 199.6                 |                    |                |
| 4                                           | 42.4                  | 2.05               | dd (17, 10)    | 4, 4'                                    | 125.5                 | 5.92               | br. s          |
|                                             |                       | 2.39               | dd (17, 7)     |                                          |                       |                    |                |
| 5                                           | 126.2                 |                    |                | 5, 5'                                    | 162.7                 |                    |                |
| 6                                           | 137.6                 |                    |                | 6, 6'                                    | 56.3                  | 2.61               | d (9)          |
| 7                                           | 125.6                 | 6.10               | d (16)         | 7, 7'                                    | 125.6                 | 5.54               | dd (15, 9)     |
| 8                                           | 138.5                 | 6.13               | d (16)         | 8, 8'                                    | 138.4                 | 6.24               | d (15)         |
| 9                                           | 135.8                 |                    |                | 9, 9'                                    | 134.5                 |                    |                |
| 10                                          | 131.2                 | 6.16               | d (10)         | 10, 10'                                  | 132.0                 | 6.18               | d (11)         |
| 11                                          | 125.0                 | ~6.65              | overlapped     | 11, 11'                                  | 124.5                 | 6.68               | dd(15, 11)     |
| 12                                          | 137.5                 | 6.37               | d (14)         | 12, 12'                                  | 138.2                 | 6.39               | d (15)         |
| 13                                          | 136.7                 |                    |                | 13, 13'                                  | 136.5                 |                    |                |
| 14                                          | 132.5                 | 6.26               | d (11)         | 14, 14'                                  | 133.0                 | 6.28               | br.d (10)      |
| 15                                          | 130.3                 | ~6.65              | overlapped     | 15, 15'                                  | 130.2                 | 6.66               | multiplet      |
| 16                                          | 28.7/30.2             | 1.07               | s              | 16, 16'                                  | 27.5/27.9             | 0.97/1.05          | s              |
| 17                                          | 28.7/30.2             | 1.07               | s              | 17, 17'                                  | 27.5/27.9             | 0.97/1.05          | s              |
| 18                                          | 21.7                  | 1.74               | s              | 18, 18'                                  | 23.8                  | 1.92               | s              |
| 19                                          | 12.8                  | 1.97               | s              | 19, 19'                                  | 13.1                  | 1.92               | s              |
| 20                                          | 12.8                  | 1.98               | s              | 20, 20'                                  | 12.8                  | 1.98               | s              |
| 1'                                          | 36.6                  |                    |                |                                          |                       |                    |                |
| 2'                                          | 47.4                  | 2.10               | d (17)         |                                          |                       |                    |                |
|                                             |                       | 2.39               | d (17)         |                                          |                       |                    |                |
| 3'                                          | 199.6                 |                    |                |                                          |                       |                    |                |
| 4'                                          | 125.5                 | 5.92               | br. s          |                                          |                       |                    |                |
| 5'                                          | 162.7                 |                    |                |                                          |                       |                    |                |
| 6'                                          | 56.3                  | 2.61               | d (9)          |                                          |                       |                    |                |
| 7'                                          | 125.5                 | 5.54               | dd (15, 9)     |                                          |                       |                    |                |
| 8'                                          | 138.4                 | 6.24               | d (15)         |                                          |                       |                    |                |
| 9'                                          | 134.4                 |                    |                |                                          |                       |                    |                |
| 10'                                         | 132.0                 | 6.18               | d (10)         |                                          |                       |                    |                |
| 11'                                         | 124.4                 | 6.60               | dd (15, 11)    |                                          |                       |                    |                |
| 12'                                         | 138.3                 | 6.39               | d (14)         |                                          |                       |                    |                |
| 13'                                         | 136.2                 |                    |                |                                          |                       |                    |                |
| 14'                                         | 133.0                 | 6.28               | d (11)         |                                          |                       |                    |                |
| 15'                                         | 129.9                 | ~6.65              | overlapped     |                                          |                       |                    |                |
| 16'                                         | 27.4/27.9             | 0.97/1.05          | s              |                                          |                       |                    |                |
| 17'                                         | 27.4/27.9             | 0.97/1.05          | s              |                                          |                       |                    |                |
| 18'                                         | 23.8                  | 1.92               | s              |                                          |                       |                    |                |
| 19'                                         | 13.1                  | 1.92               | s              |                                          |                       |                    |                |
| 20'                                         | 12.8                  | 1.97               | s              |                                          |                       |                    |                |
